# Supplementary material
Source: PubMed Central journal article supplement (PMC3753960)
Supplement: AEM.01484-13_zam999104648so1.pdf [file AEM.01484-13_zam999104648so1.pdf]

**TABLE S1.** Isolates of *Ceratocystis* species considered in the phylogenetic study.

| Fungal species         | Strain identification | GenBank accession n. <sup>a</sup> |              |                 |
|------------------------|-----------------------|-----------------------------------|--------------|-----------------|
|                        |                       | ITS                               | Beta-tubulin | Cerato-platanin |
| <i>C. cacaofunesta</i> | CBS15362              | KC493170                          | KF302698     | KF302683        |
| <i>C. fimbriata</i>    | CBS115166             | KC493162                          | KF302691     | KF302677        |
| <i>C. fimbriata</i>    | CBS14653              | ND                                | KF302702     | KF302682        |
| <i>C. fimbriata</i>    | CBS115167             | KC493164                          | KF302692     | KF302678        |
| <i>C. fimbriata</i>    | CBS115173             | KC493168                          | KF302700     | KF302686        |
| <i>C. fimbriata</i>    | CBS118126             | KC493165                          | KF302696     | KF302681        |
| <i>C. fimbriata</i>    | CBS114723             | KC493160                          | KF302689     | KF302676        |
| <i>C. fimbriata</i>    | CBS115175             | KC493167                          | KF302701     | KF302687        |
| <i>C. fimbriata</i>    | CBS115174             | KC493163                          | KF302693     | KF302679        |
| <i>C. fimbriata</i>    | CBS115171             | KC493169                          | KF302697     | KF302685        |
| <i>C. fimbriata</i>    | CBS74040              | ND                                | KF302699     | KF302684        |
| <i>C. fimbriata</i>    | CBS114717             | KC493159                          | KF302688     | ND              |
| <i>C. populicola</i>   | CBS115161             | KC493171                          | KF302695     | ND              |
| <i>C. platani</i>      | CBS115162             | KC493161                          | KF302690     | ND              |
| <i>C. platani</i>      | CBS117355             | KC493166                          | KF302694     | KF302680        |
| <i>C. variospora</i>   | CBS114714             | ND                                | KF302703     | ND              |

<sup>a</sup>ND = sequence not determined

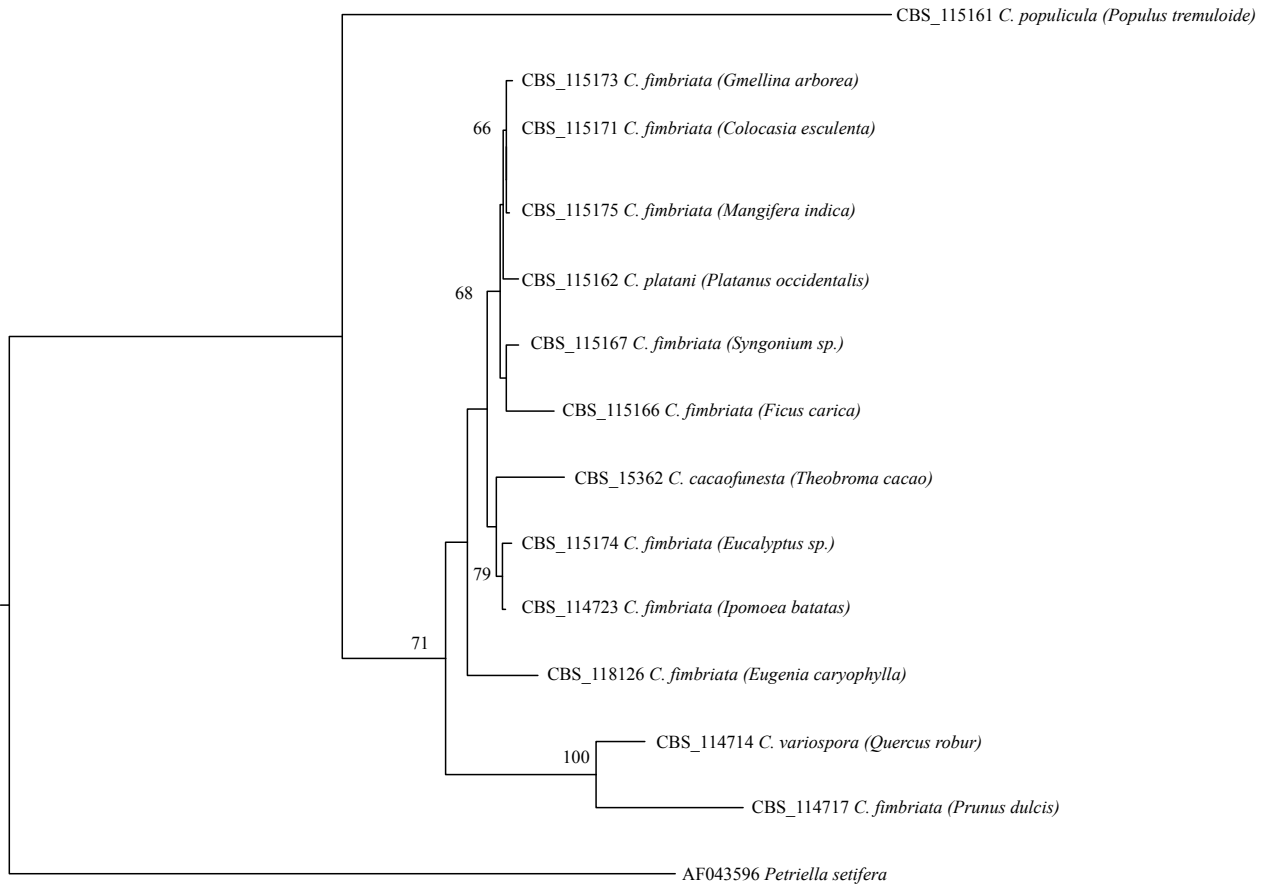

**FIG. S2.** Phylogenetic tree of the *Ceratocystis* species/strains, based on ITS sequences. The numbers at the nodes indicate bootstrap values as obtained with the Maximum Likelihood algorithm of RAxML software.

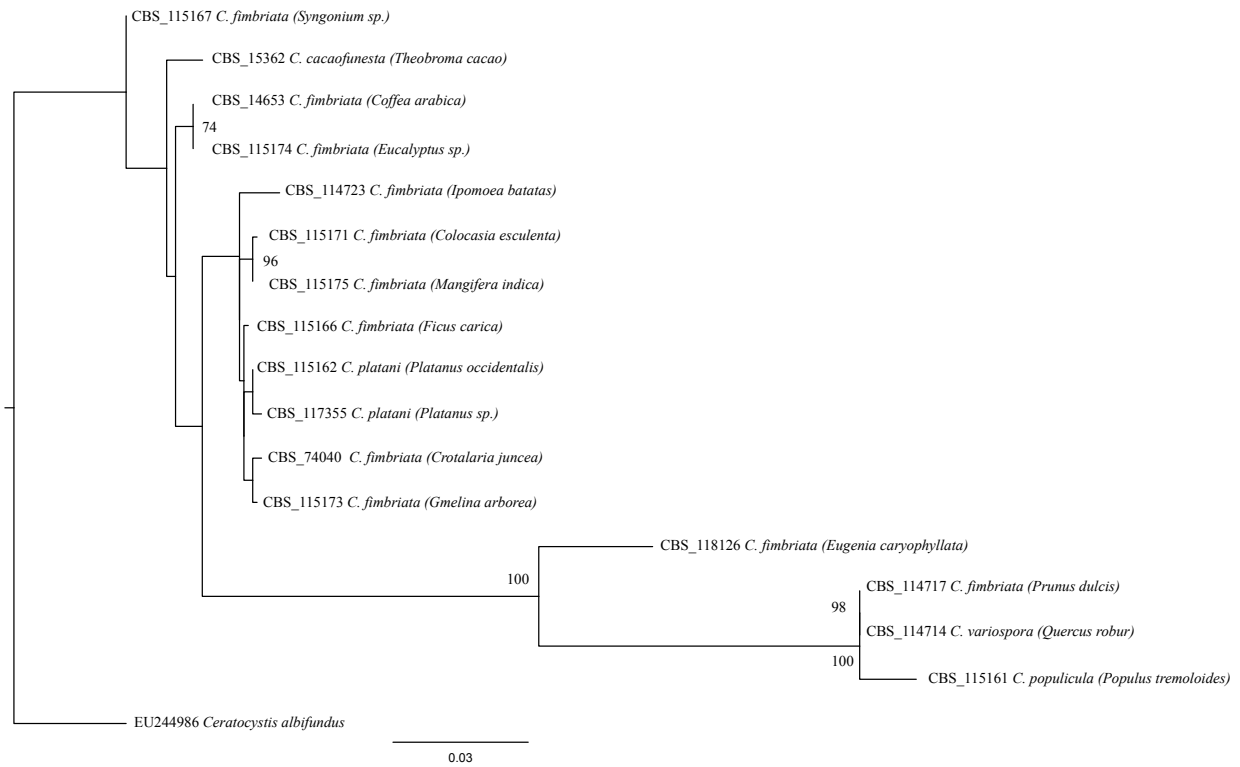

**FIG. S3.** Phylogenetic tree of the *Ceratocystis* species/strains, based on concatenated  $\beta$ -tubulin and CP sequences. The numbers at the nodes indicate bootstrap values as obtained with the Maximum Likelihood algorithm of RAxML software.
